# Supplementary material
Source: PubMed Central journal article supplement (PMC2719366)
Supplement: M109.003194_1.pdf [file M109.003194_1.pdf]

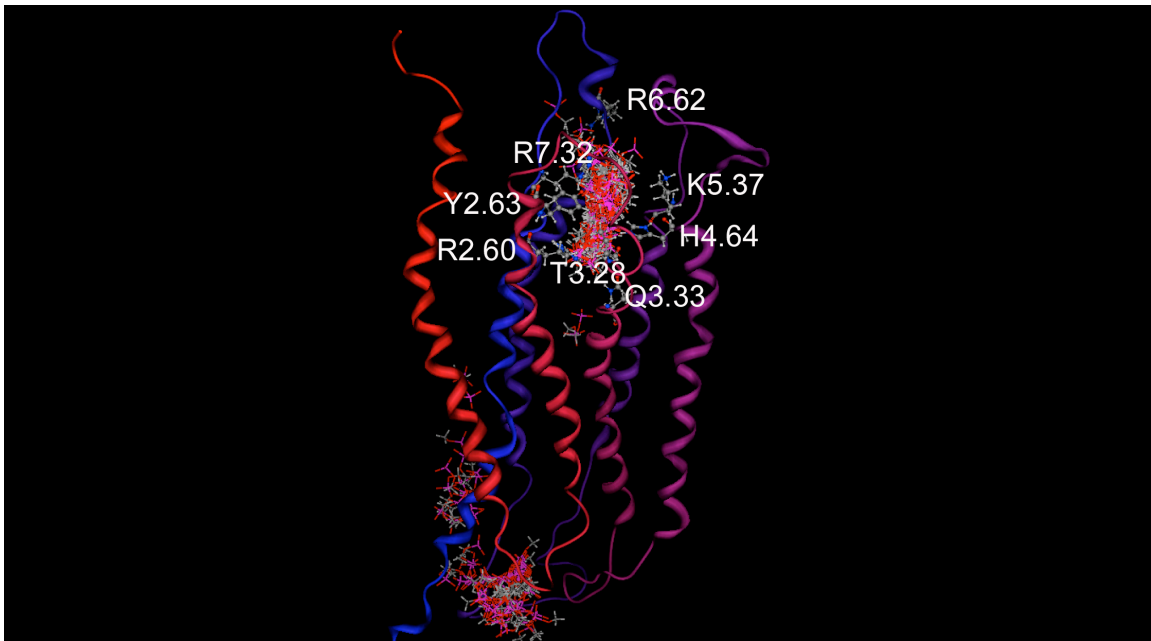

Supplemental Figure 1: **Multi-Fragment Search.** Mutated residues shown in ball and stick. Methyl-phosphate fragment positions optimized relative to the receptor to identify favorable phosphate interaction sites.
