# Supplementary material
Source: PubMed Central journal article supplement (PMC2719366)

## Supplemental Figure 2

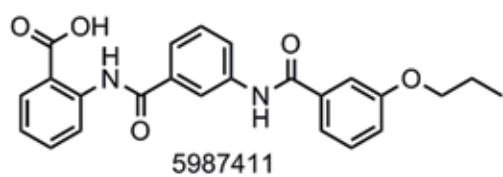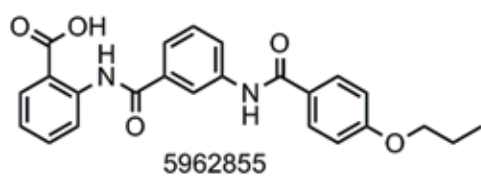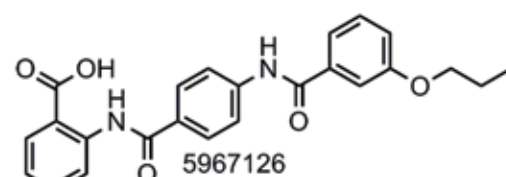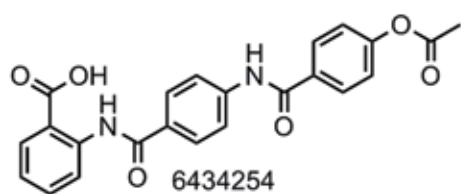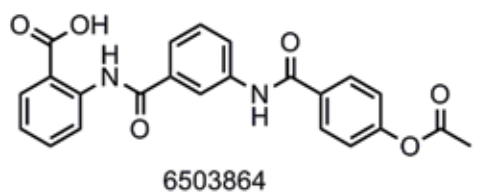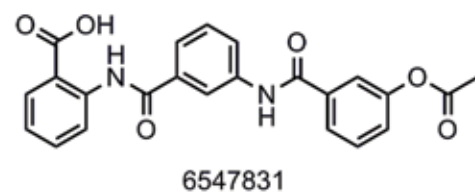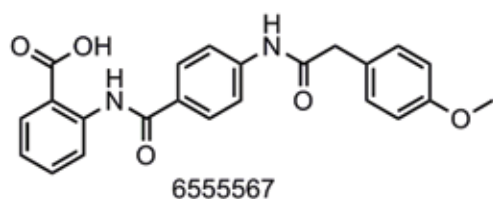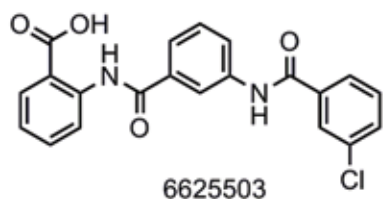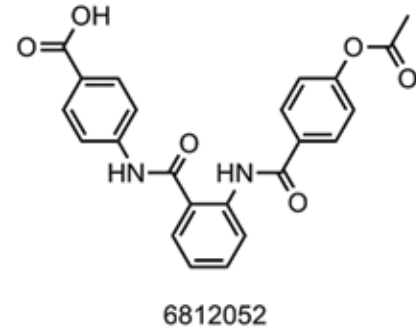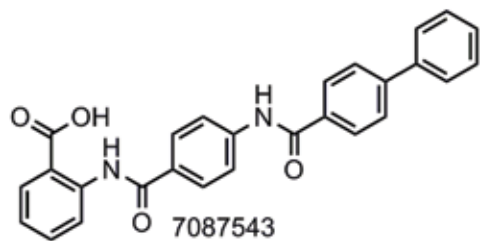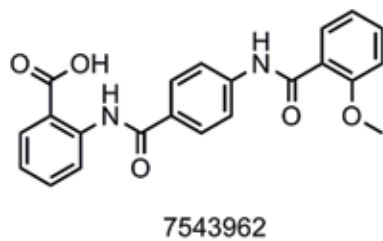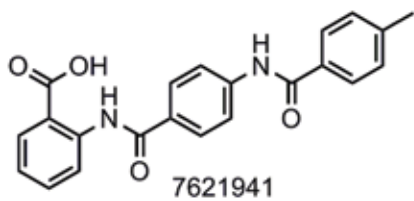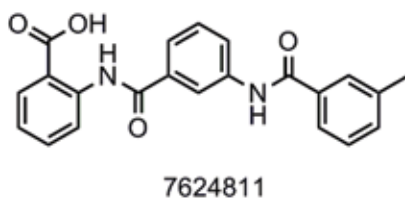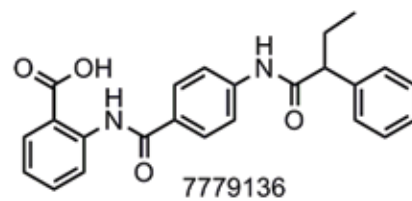

Supplement: M109.003194_2.pdf [file M109.003194_2.pdf]
